# Supplementary material
Source: Springer Nature journal article supplement (https://www.springermedizin.de/resource/supplementary/13034_2008_67_MOESM3_ESM.pdf/9652246)

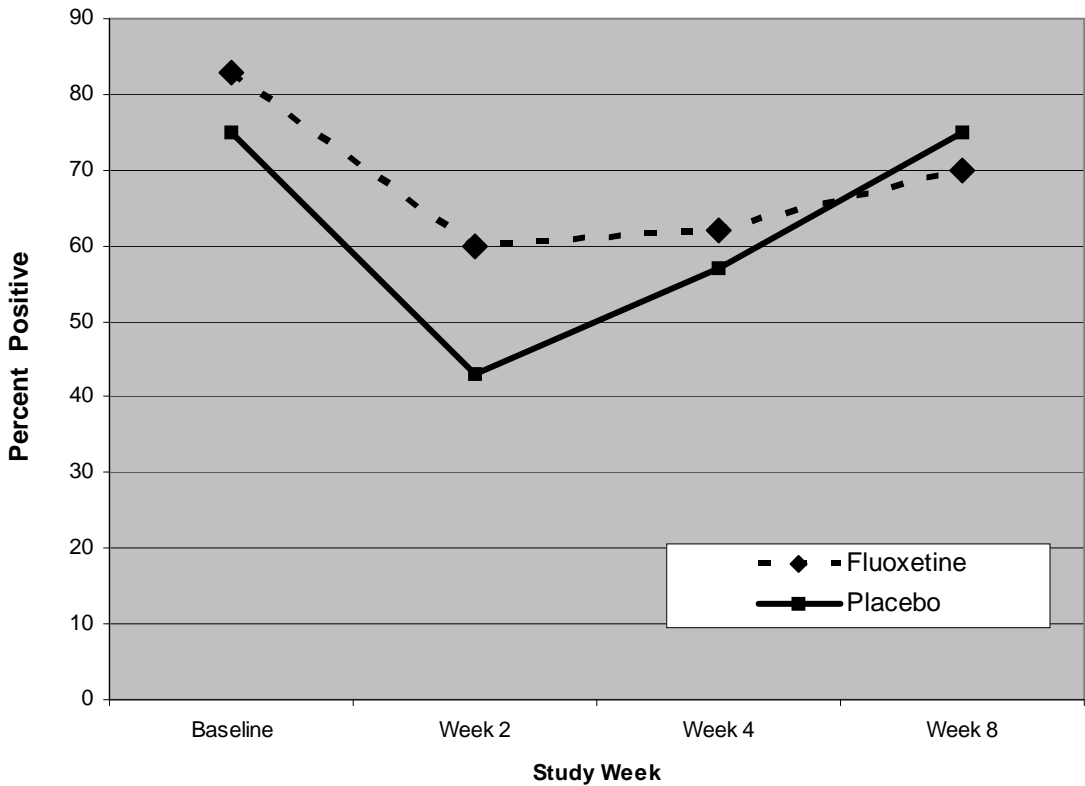

Supplement: MOESM3 [file 9652246]
